# Supplementary material
Source: publisher figshare collection journal article supplement (https://acs.figshare.com/ndownloader/files/4817314)
Supplement: Supplementary file 1 [file 4817314]

## Supporting Information

### **Thermal Transport Driven by Extraneous Nanoparticles and Phase Segregation in Nanostructured $\text{Mg}_2(\text{Si},\text{Sn})$ and Estimation of Optimum Thermoelectric Performance**

Abdullah S. Tazebay<sup>1</sup>, Su-In Yi<sup>1</sup>, Jae Ki Lee<sup>2</sup>, Hyunghoon Kim<sup>3</sup>, Je-Hyeong Bahk<sup>4</sup>, Suk Lae Kim<sup>1</sup>, Su-Dong Park<sup>2</sup>, Ho Seong Lee<sup>3</sup>, Ali Shakouri<sup>4</sup>, Choongho Yu<sup>1,\*</sup>

<sup>1</sup>Department of Mechanical Engineering, Texas A&M University, College Station, TX 77843, USA

<sup>2</sup>Korea Electrotechnology Research Institute, Changwon, Korea

<sup>3</sup>School of Materials Science and Engineering, Kyungpook National University, 80 Daehak-ro, Buk-gu, Daegu 702-701, Korea

<sup>4</sup>Birck Nanotechnology Center, Purdue University, West Lafayette, IN 47907, USA

\*Corresponding author: [chyu@tamu.edu](mailto:chyu@tamu.edu)

**Table S1.** Atomic ratios of raw elements and volume fractions of TiO<sub>2</sub> nanoparticles in 12 different kinds of solid solutions made of magnesium silicide and magnesium stannide. Note that 10% excessive magnesium was used to compensate loss during synthesis processes.

| Sample no. | Volume fraction  | Atomic ratio |        |       |       |     |       |       |     |
|------------|------------------|--------------|--------|-------|-------|-----|-------|-------|-----|
|            | TiO <sub>2</sub> | Sn           | Sb     | Si    | As    | Mg  |       |       |     |
| 1          | 0%               | 0.5925       | 0.0075 | 0.392 | 0.008 | 2.2 |       |       |     |
| 2          | 1%               |              |        |       |       |     |       |       |     |
| 3          | 2%               |              |        |       |       |     |       |       |     |
| 4          | 5%               |              |        |       |       |     |       |       |     |
| 5          | 0%               | 0.585        | 0.015  |       |       |     | 0.392 | 0.008 | 2.2 |
| 6          | 0.1%             |              |        |       |       |     |       |       |     |
| 7          | 0.2%             |              |        |       |       |     |       |       |     |
| 8          | 0.5%             |              |        |       |       |     |       |       |     |
| 9          | 1%               |              |        |       |       |     |       |       |     |
| 10         | 2%               |              |        |       |       |     |       |       |     |
| 11         | 5%               |              |        |       |       |     |       |       |     |
| 12         | 10%              |              |        |       |       |     |       |       |     |

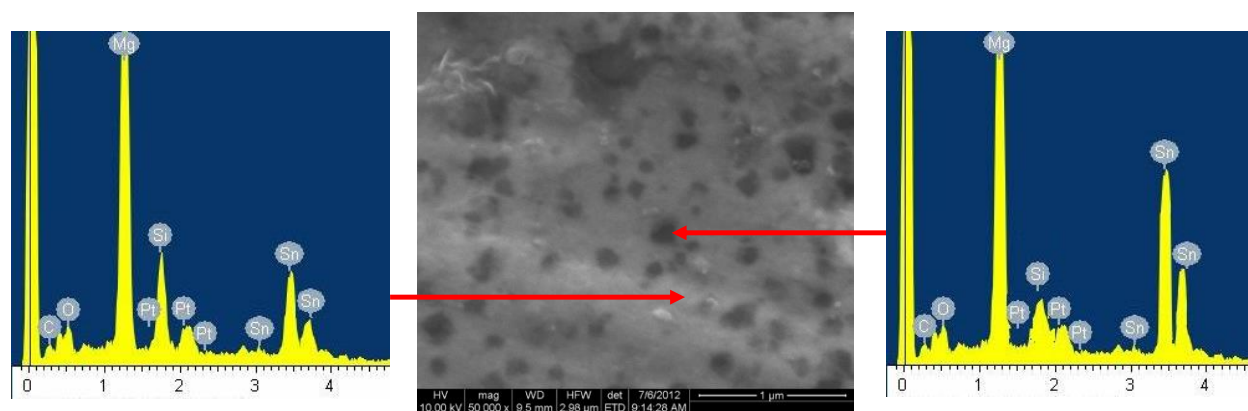

**Figure S1.** Scanning electron microscope (SEM) image with energy dispersive spectroscopy (EDS) results on dark and grey regions.

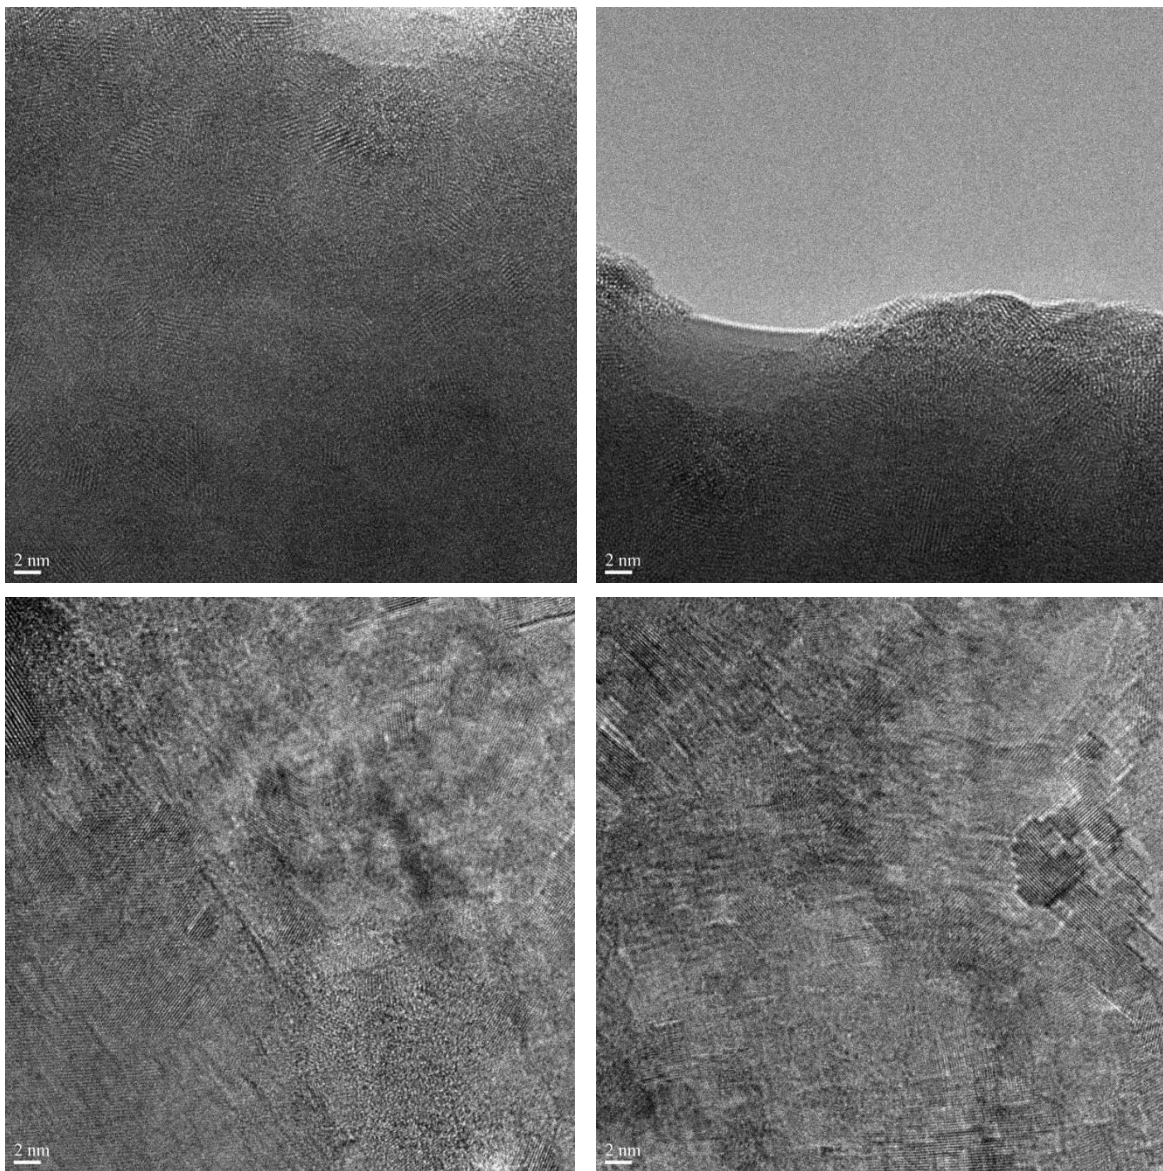

**Figure S2.** High resolution transmission electron microscope (TEM) images used to determine distribution of nanograin sizes. The scale bar indicates 2 nm (continued to the next page).

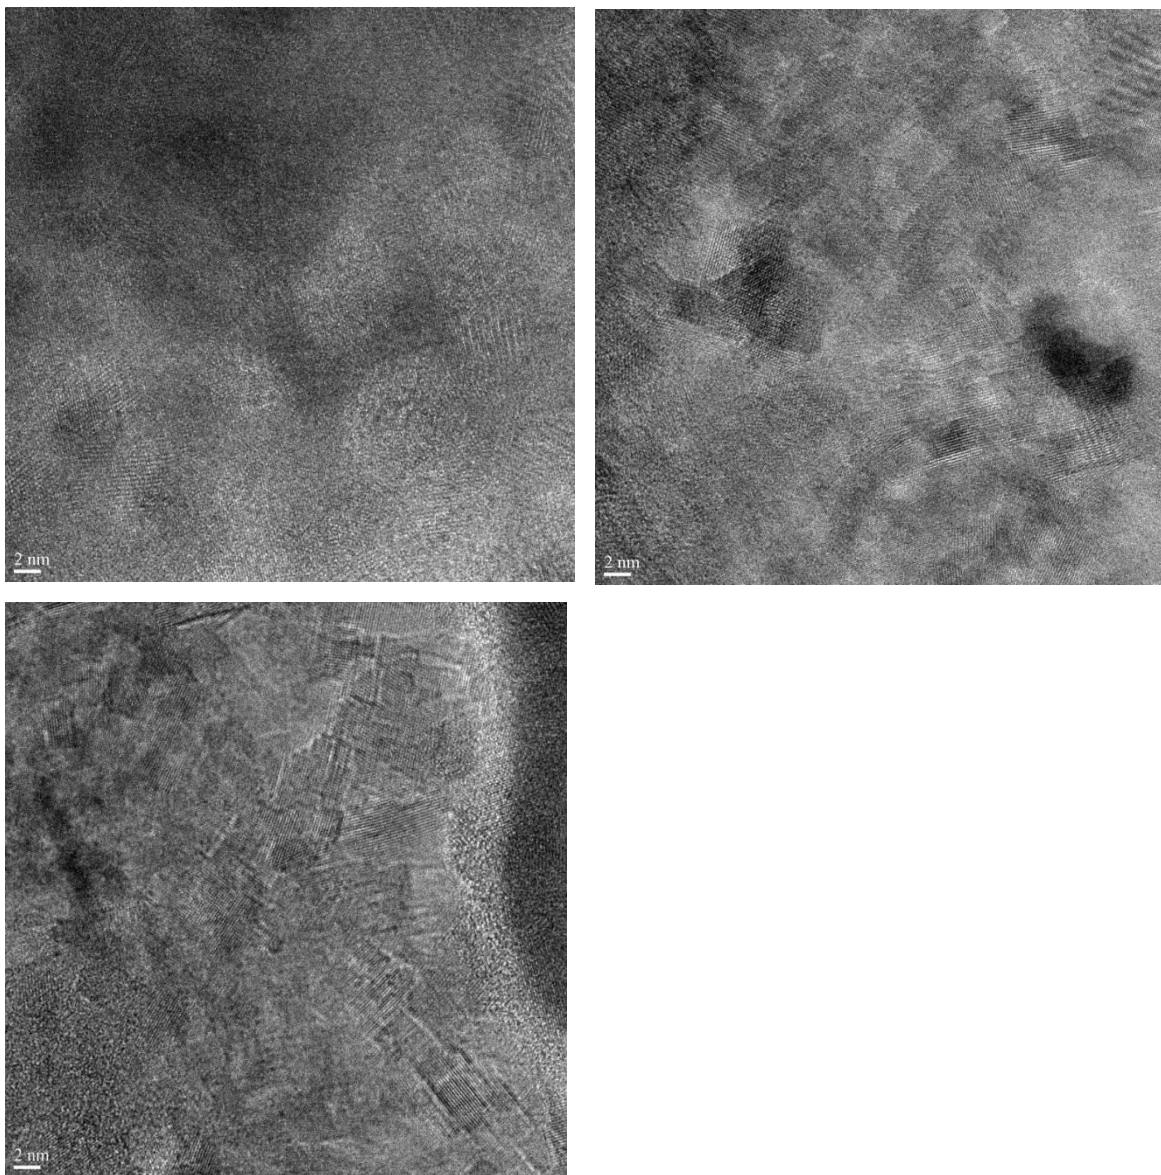

**Figure S2.** (continued from the previous page)



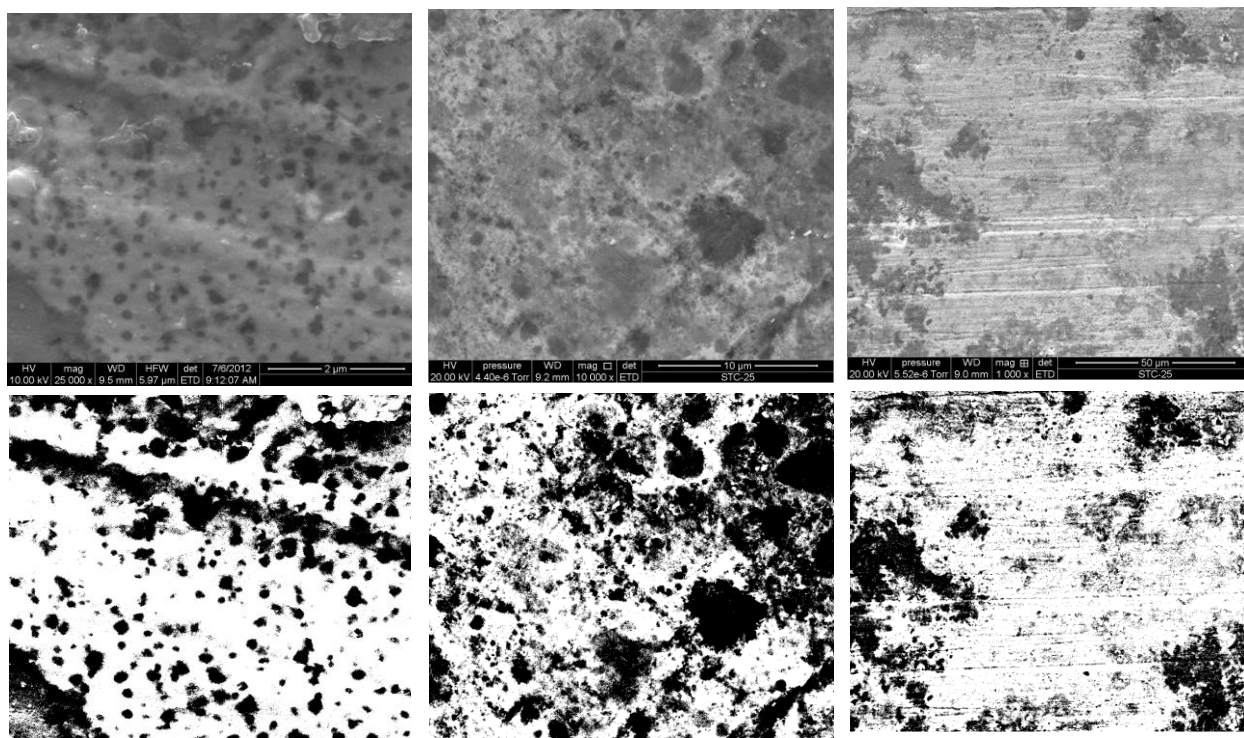

**Figure S3.** SEM images (upper row) used to estimate the ratio of phase segregation percentage and binary masks (lower row) created from those figures in the first row by using ImageJ.

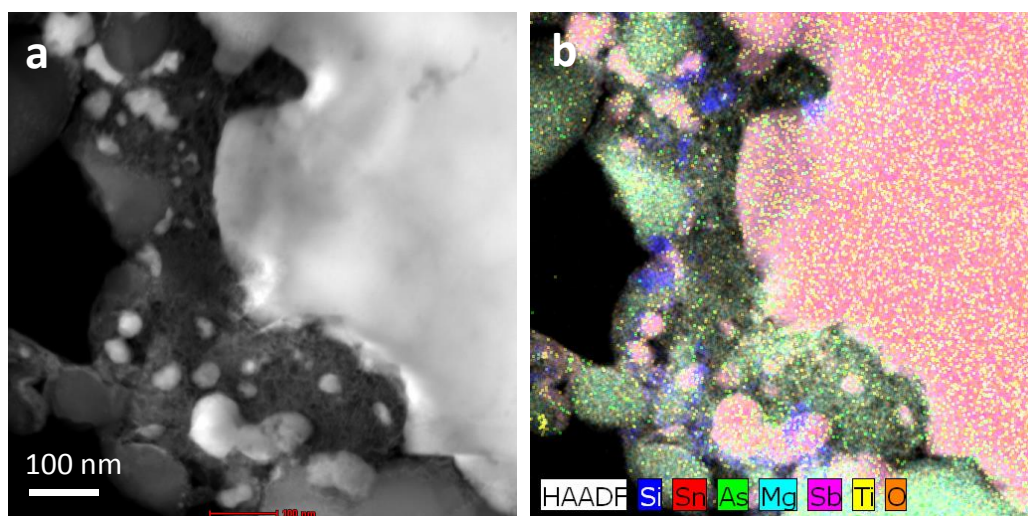

**Figure S4.** (a) TEM-EDS elemental mapping of Sample 6 (2%  $\text{TiO}_2$ ). (b) Colored mapping results of Si, Sn, As, Mg, Sb, Ti, and O.

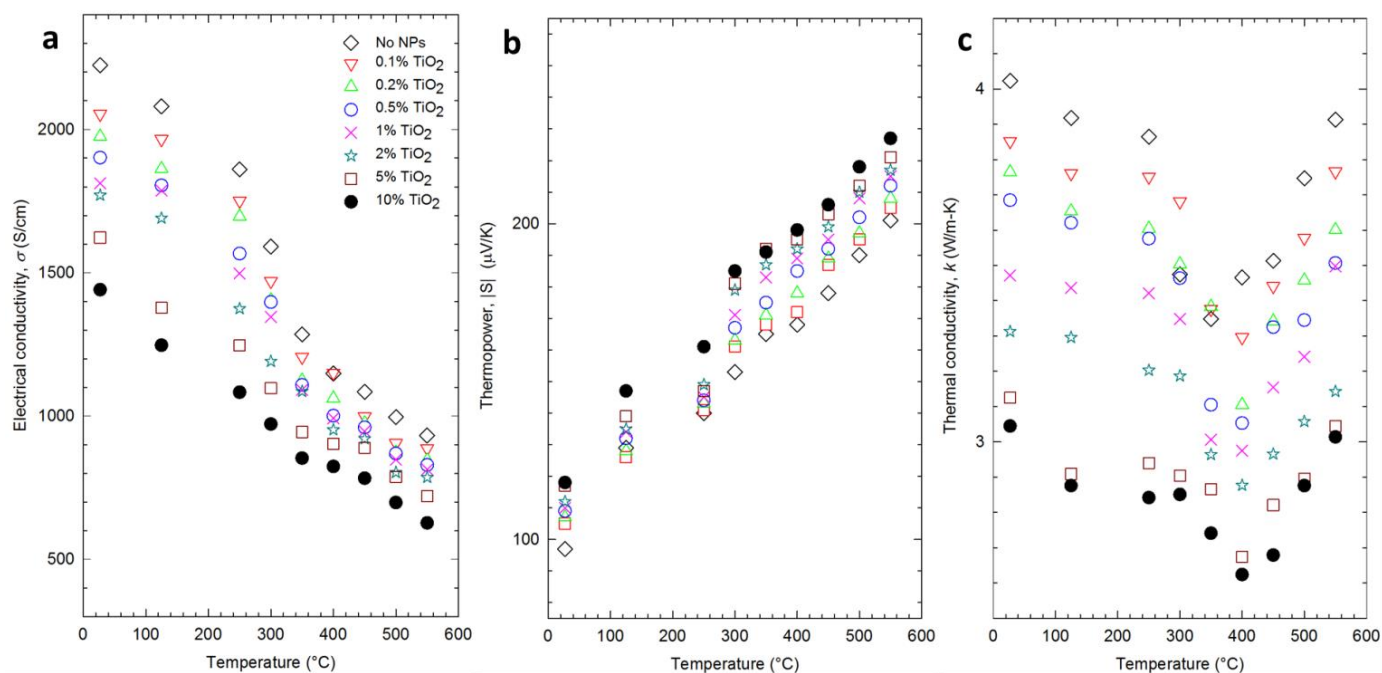

**Figure S5.** Electrical conductivity (a), thermopower (b), and thermal conductivity (c) of Sample 5~12 containing TiO<sub>2</sub> nanoparticles (0~10 vol%) and 1.5% Sb dopants.

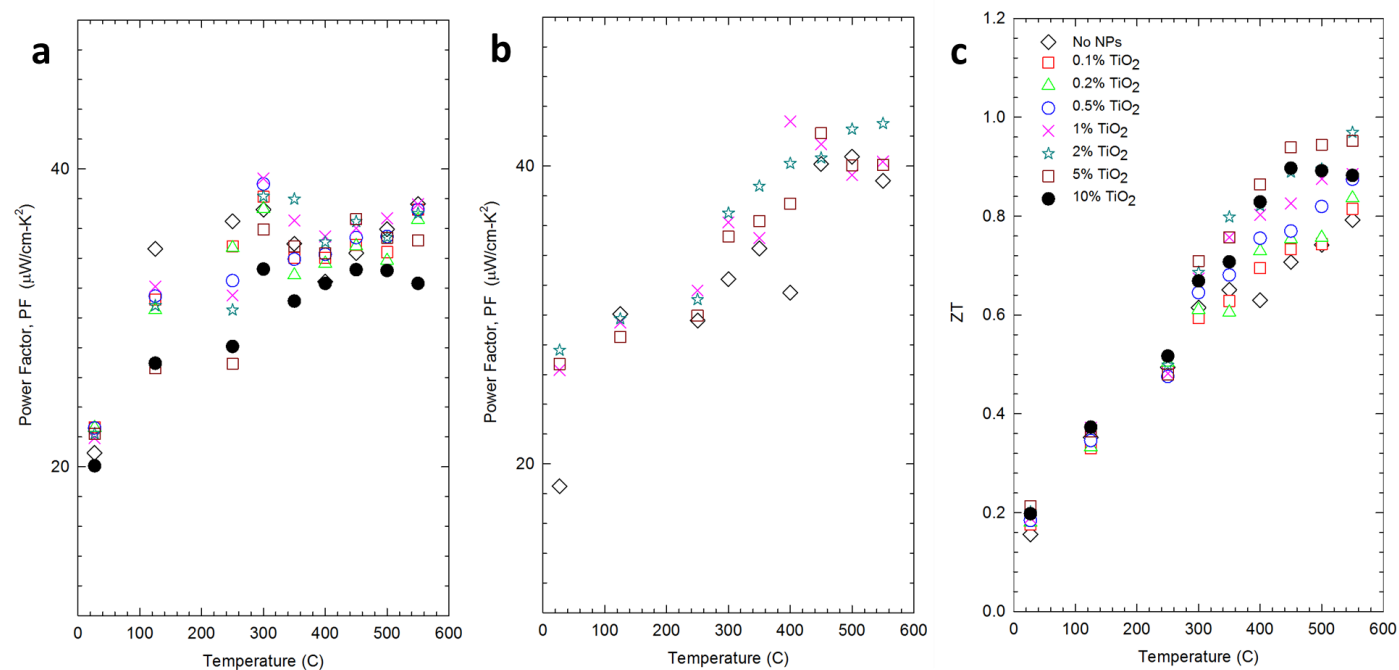

**Figure S6.** Thermoelectric power factor of Sample 5~12 (a) and Sample 1~4 (b). Thermoelectric figure of merit (ZT) of Sample 5~12 (c).

### Electrical Conductivity and Thermopower Calculation

Electron (or majority) carrier concentration ( $N_e$ ) and hole (or minority) carrier concentration ( $N_h$ ) can be calculated with the Fermi levels as input parameters:

$$N_e = N_{V,X3} \int_0^\infty \frac{\sqrt{2E} (m_{X3}^*)^{1.5} / (\pi^2 \hbar^3)}{\exp[(E - E_{F,X3}) / (k_B T)] + 1} dE + N_{V,X1} \int_0^\infty \frac{\sqrt{2E} (m_{X1}^*)^{1.5} / (\pi^2 \hbar^3)}{\exp[(E - E_{F,X1}) / (k_B T)] + 1} dE \quad (S1)$$

$$N_h = N_{V,HH} \int_0^\infty \frac{\sqrt{2E} (m_{HH}^*)^{1.5} / (\pi^2 \hbar^3)}{\exp[(E - E_{F,HH}) / (k_B T)] + 1} dE + N_{V,LH} \int_0^\infty \frac{\sqrt{2E} (m_{LH}^*)^{1.5} / (\pi^2 \hbar^3)}{\exp[(E - E_{F,LH}) / (k_B T)] + 1} dE \quad (S2)$$

Here we considered two X-valleys in the conduction band (labeled as X1 and X3) and two  $\Gamma$ -valleys in the valence band (labeled as HH, and LH), as shown in Fig. S6.<sup>1</sup> Each integral was calculated with respect to the band edge of each valley (*i.e.*,  $E = 0$  at the band edge). For convenience, we used the band edge of X3 valley as a reference, the four valleys can be expressed with the Fermi level ( $E_F$ ) as:

$$E_{F,X3} = E_F \quad (S3)$$

$$E_{F,X1} = E_F - E_0 \quad (S4)$$

$$E_{F,HH} = E_{F,LH} = -(E_G + E_F) \quad (S5)$$

where  $E_0$  is the energy offset ( $E_{Edge,X1} - E_{Edge,X3}$ ) and  $E_G$  is the band gap as shown in Fig. S6.

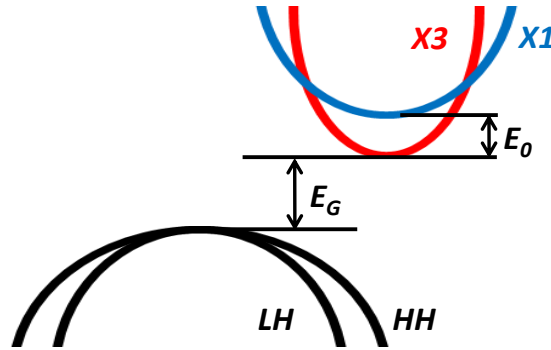

**Figure S7.** Multi valley schematic of  $\text{Mg}_2\text{Si}_{0.4}\text{Sn}_{0.6}$ .

With the effective mass ( $m^*$ ) in Table S1,  $N_e$  and  $N_h$  were found, and then ionized impurity concentration ( $N_{II}$ ) was calculated by:

$$N_{II} = N_e - N_h \quad (S6)$$



Thermopower ( $S$ ) can be calculated with electrical conductivity ( $\sigma$ ) by:

$$S = \sum_j S_j \frac{\sigma_j}{\sigma} \quad (S7)$$

$$S_j = \int_0^\infty \frac{\sigma_{d,j}(E)}{\sigma_j} \left( \frac{E - E_{F,j}}{qT} \right) dE \quad (S8)$$

$$\sigma_{d,j}(E) = q^2 \times D_j(E) \times \left( -\frac{df_j(E)}{dE} \right) \times \tau_j(E) \times \{v_j(E)\}^2 \quad (S9)$$

$$D_j(E) = \frac{\sqrt{2}(m_j^*)^{1.5}}{\pi^2 \hbar^3} \sqrt{E} \quad (S10)$$

$$f_j(E) = \frac{1}{\exp\left[\left(E - E_{F,j}\right)/(k_B T)\right] + 1} \quad (S11)$$

$$\tau_j(E) = \left( \tau_{AC,j}^{-1}(E) + \tau_{II,j}^{-1}(E) + \tau_{POP,j}^{-1}(E) + \tau_{NI,j}^{-1}(E) \right)^{-1} \quad (S12)$$

$$v_j(E) = \sqrt{\frac{2E}{3m_j^*}} \quad (S13)$$

$$\sigma_j = N_{v,j} \int_0^\infty \sigma_{d,j}(E) dE \quad (S14)$$

$$\sigma = \sum_j \sigma_j \quad (S15)$$

where  $q$ ,  $T$ ,  $E$ ,  $m^*$ ,  $N_V$  are electron charge, absolute temperature, carrier energy with respect to band edge, carrier effective mass, and valley degeneracy, respectively. The index  $j$  indicates valley (X1, X3, HH, and LH). The subscripts  $AC$ ,  $POP$ ,  $II$ , and  $NI$  in scattering relaxation time represent acoustic phonon, ionized impurity, polar optical phonon, non-ionized impurity, respectively. The material parameters employed are summarized in Table S2.

The mobility of electron ( $\mu_e$ ) and hole ( $\mu_h$ ) carriers can be obtained by:

$$\mu_e = \frac{\sigma_{X1} + \sigma_{X3}}{qN_e} \quad (S16)$$

$$\mu_h = \frac{\sigma_{HH} + \sigma_{LH}}{qN_h} \quad (S17)$$

The mean free path of electronic carrier ( $l_j$ ) as a function of energy in valley  $j$  can be obtained by:

$$l_j = \sqrt{\frac{2E}{m_j^*}} \times \tau_j \quad (S18)$$

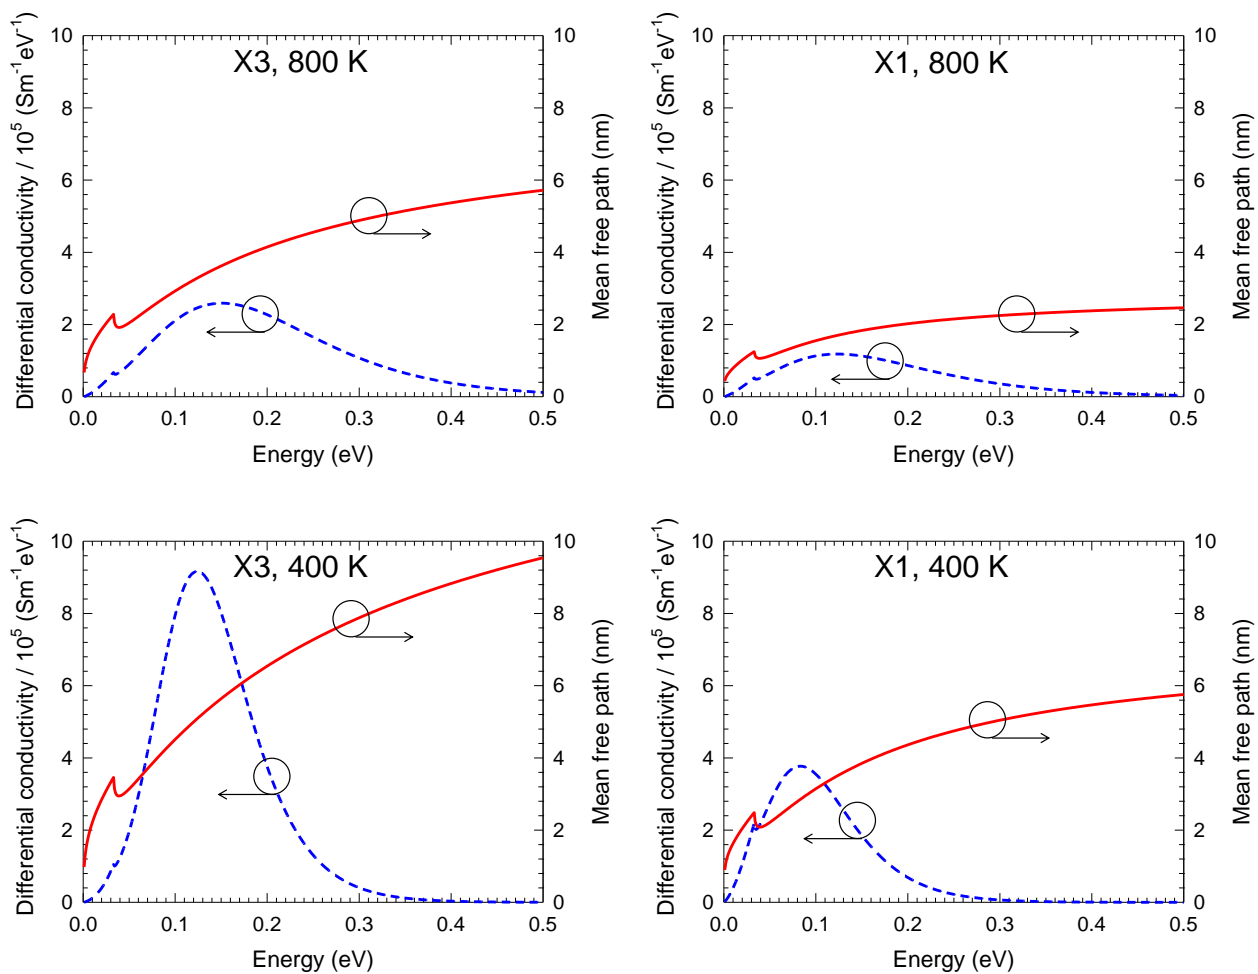

**Figure S8.** Calculated mean free path of electron carriers in X3 and X1 valley as a function of energy for no TiO<sub>2</sub> nanoparticle sample at 800 K and 400 K using the velocity and relaxation time.

**Table S2.** Parameters used for calculation.<sup>1-2</sup> The atomic concentration of Sn is  $y$ .

| Parameters                                   | Values                                                                                          |
|----------------------------------------------|-------------------------------------------------------------------------------------------------|
| $m_{X3}^* (m_0)$                             | 0.38                                                                                            |
| $m_{XI}^* (m_0)$                             | $0.49+2.0 \times 10^{-4} \times T$                                                              |
| $m_{HH}^* (m_0)$                             | 1.5                                                                                             |
| $m_{LH}^* (m_0)$                             | 1.0                                                                                             |
| $E_G$ (eV)                                   | $(0.78-4.0 \times 10^{-4} \times T) \times (1-y) + (0.38-2.8 \times 10^{-4} \times T) \times y$ |
| $E_0$ (eV)                                   | $(0.4) \times (1-y) + (-0.165) \times y$                                                        |
| $\varepsilon_0$ (F/m)                        | $(20 \times (1-y) + 23.75 \times y) \times 8.85 \times 10^{-12}$                                |
| $\varepsilon_\infty$ (F/m)                   | $(13.3 \times (1-y) + 17 \times y) \times 8.85 \times 10^{-12}$                                 |
| $\hbar\omega_0$ (meV)                        | $40 \times (1-y) + 28.8 \times y$                                                               |
| $\rho_{NP}$ (g/cm <sup>3</sup> )             | 3.78                                                                                            |
| $d$ (nm)                                     | 11                                                                                              |
| $\rho_M$ (g/cm <sup>3</sup> )                | $1.88 \times (1-y) + 3.59 \times y$                                                             |
| $D_e$ (eV)                                   | 7                                                                                               |
| $D_h$ (eV)                                   | 1                                                                                               |
| $C_i$ (N/m <sup>2</sup> )                    | $(4.15 \times (1-y) + 3.22 \times y) \times 10^{10}$                                            |
| $\omega_{C,L}$ (THz)                         | $52.3 \times (1-y) + 22.4 \times y$                                                             |
| $\omega_{C,T}$ (THz)                         | $29.7 \times (1-y) + 13.9 \times y$                                                             |
| $v_L$ (m/s)                                  | $7700 \times (1-y) + 4900 \times y$                                                             |
| $v_T$ (m/s)                                  | $4900 \times (1-y) + 3000 \times y$                                                             |
| $\gamma$                                     | $2.5 \times (1-y) + 1.7 \times y$                                                               |
| $\alpha$ for TiO <sub>2</sub> 0%, 1%, 2%, 5% | Respectively 0.65, 0.60, 0.55, 0.50                                                             |
| $\beta$ for TiO <sub>2</sub> 0%, 1%, 2%, 5%  | Respectively 1, 0.8, 0.6, 0.5                                                                   |
| $N_{V,X3}, N_{V,XI}$                         | 3                                                                                               |
| $N_{V,HH}, N_{V,LH}$                         | 1                                                                                               |

### Thermal Conductivity Calculation

Electronic thermal conductivity ( $k_e$ ) and bipolar thermal conductivity ( $k_{bi}$ ) can be calculated by:

$$k_e = \sum_j L_j \sigma_j T \quad (S19)$$

The Lorenz number is expressed as:

$$L_j = \int_0^\infty \frac{\sigma_{d,j}(E)}{\sigma_j} \left( \frac{E - E_{F,j}}{qT} \right)^2 dE - \left\{ \int_0^\infty \frac{\sigma_{d,j}(E)}{\sigma_j} \left( \frac{E - E_{F,j}}{qT} \right) dE \right\}^2 \quad (S20)$$

$$k_{bi} = \frac{\sigma_e \sigma_h}{\sigma_e + \sigma_h} (S_e - S_h)^2 T \quad (S21)$$

where

$$\sigma_e = \sigma_{X1} + \sigma_{X3}; \quad \sigma_h = \sigma_{HH} + \sigma_{LH} \quad (S22)$$

$$S_e = \frac{\sigma_{X1} S_{X1} + \sigma_{X3} S_{X3}}{\sigma_e}; \quad S_h = \frac{\sigma_{HH} S_{HH} + \sigma_{LH} S_{LH}}{\sigma_h} \quad (S23)$$

Lattice thermal conductivity was calculated by using a modified Callaway model that separately considered longitudinal and transverse modes of phonons.

$$k_l = \frac{1}{3} (k_L + 2k_T) \quad (S24)$$

$$k_i = \frac{k_B^4 T^3}{2\pi^2 \hbar^3} \left( \frac{1}{v_i} \right) \left( I_{i1} + \frac{I_{i2}^2}{I_{i3}} \right) \quad (S25)$$

The subscript  $i$  stands for either longitudinal mode ( $L$ ) or transverse mode ( $T$ ).

$$I_{i1} = \int_0^{\theta_i/T} \tau_{p,i} \frac{x^4 e^x}{(e^x - 1)^2} dx \quad (S26)$$

$$I_{i2} = \int_0^{\theta_i/T} \frac{\tau_{p,i}}{\tau_{pN,i}} \frac{x^4 e^x}{(e^x - 1)^2} dx \quad (S27)$$

$$I_{i3} = \int_0^{\theta_i/T} \frac{\tau_{p,i}}{\tau_{pN,i} \tau_{pR,i}} \frac{x^4 e^x}{(e^x - 1)^2} dx \quad (S28)$$

where  $x = \hbar\omega/(k_B T)$  is the reduced energy of phonon and  $\theta_i$  is the Debye temperature.

$$\frac{1}{\tau_{p,i}} = \frac{1}{\tau_{pN,i}} + \frac{1}{\tau_{pR,i}} \quad (S29)$$

The relaxation time corresponding to the normal scattering is described as:<sup>3</sup>

$$(\tau_{pN,L})^{-1} = \frac{k_B^5 \gamma^2 V}{M v_L^5 \hbar^4} x^2 T^5 \quad (S30)$$

$$(\tau_{pN,T})^{-1} = \frac{k_B^5 \gamma^2 V}{M v_T^5 \hbar^4} x T^5 \quad (\text{S31})$$

where  $k_B$ ,  $\gamma$ ,  $V$ ,  $M$ ,  $v_L$ ,  $v_T$ ,  $\hbar$  and  $T$  are Boltzmann constant, Grüneisen parameter, average volume of an atom, average mass of an atom, longitudinal sound velocity, transverse sound velocity, reduced Planck constant, and absolute temperature, respectively.

Umklapp scattering is expressed as:

$$(\tau_{pU,i})^{-1} = \frac{\hbar \gamma^2}{M v_i^2 \theta_i} \left( \frac{k_B}{\hbar} \right)^2 x^2 T^3 e^{-\theta_i/3T} \quad (\text{S32})$$

where  $\theta_i$  is the Debye temperature which is equal to  $\hbar \omega_C / k_B$ . The scattering due to random alloy between Si and Sn is

$$(\tau_{pA,i})^{-1} = \Gamma \frac{V}{4\pi v_i^3} \left( \frac{k_B T}{\hbar} \right)^4 x^4 \quad (\text{S33})$$

$$\Gamma = 3 \left( \frac{M_{Si,Sn}}{2M_{Mg} + M_{Si,Sn}} \right)^2 \left( (1-y) \left( \frac{M_{Si} - M_{Si,Sn}}{M_{Si,Sn}} \right)^2 + y \left( \frac{M_{Sn} - M_{Si,Sn}}{M_{Si,Sn}} \right)^2 \right) \quad (\text{S34})$$

$$M_{Si,Sn} = (1-y)M_{Si} + yM_{Sn} \quad (\text{S35})$$

where  $y$  is the atomic ratio of Sn, which is 0.6 for  $\text{Mg}_2\text{Si}_{0.4}\text{Sn}_{0.6}$ , and  $M_{Si,Sn}$  is the average atomic mass of Si and Sn accordingly with the ratio  $y$ .

Phonon scattering by electronic carriers was considered by using:

$$(\tau_{pE,i})^{-1} = (\tau_{pE,i,X3})^{-1} + (\tau_{pE,i,X1})^{-1} \quad (\text{S36})$$

$$(\tau_{pE,i,j})^{-1} = N_{v,j} \frac{D_e^2 (m_j^*)^3 v_i}{4\pi \hbar^4 \rho \beta_{i,j}} \left\{ x - \ln \left[ \frac{1 + e^{(\beta_{i,j} \frac{E_{F,j}}{k_B T} + x^2 / (16\beta_{i,j}) + x/2)}}{1 + e^{(\beta_{i,j} \frac{E_{F,j}}{k_B T} + x^2 / (16\beta_{i,j}) - x/2)}} \right] \right\} \quad (\text{S37})$$

$$\beta_{i,j} = \frac{m_j^* v_i^2}{2k_B T} \quad (\text{S38})$$

where  $D_e$  and  $\rho$  are electron deformation potential and density of  $\text{Mg}_2\text{Si}_{0.4}\text{Sn}_{0.6}$ , respectively. We ignored phonon scattering due to holes (minority carriers) since its influence on the total relaxation time is very small.

Phonon scattering by nanoparticles was considered by using:

$$(\tau_{pNP,i})^{-1} = \varsigma \frac{\pi v_i N_{NP} D_{NP}^6 k_B^4 x^4 T^4}{2k_B^4 D_{NP}^4 x^4 T^4 + 32\hbar^4 v_i^4} \quad (\text{S39})$$

$$\varsigma = 1 - \exp \left( - \frac{\rho_{NP} - \rho_M}{\rho_M} \right) \quad (\text{S40})$$

where  $N_{NP}$  is the concentration of nanoparticles and  $D_{NP}$  is the diameter of nanoparticles with the assumption of a sphere shape.  $\lambda$  accounts for the density difference between the matrix material and  $\text{TiO}_2$  nanoparticles.  $\lambda$  approaches 1 when the density difference is infinity.  $N_{NP}$  and  $D_{NP}$  are related each other since the volume percent of  $\text{TiO}_2$  nanoparticles is given.

$$N_{NP} = \frac{X / 100}{\frac{4\pi}{3} \left( \frac{D_{NP}}{2} \right)^3} \quad (\text{S41})$$

where  $X$  is the volume percent of  $\text{TiO}_2$ .  $N_{NP}$  was found to be  $1.5 \times 10^{17}$ ,  $3.1 \times 10^{17}$ , and  $2.8 \times 10^{16} \text{ cm}^{-3}$  respectively for samples with 1%, 2%, and 5%  $\text{TiO}_2$  nanoparticles.

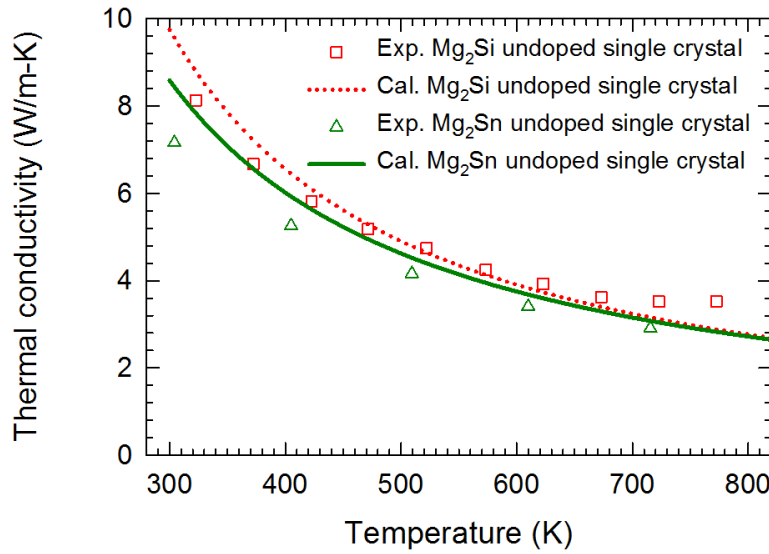

**Figure S9.** Undoped single crystalline  $\text{Mg}_2\text{Si}$  and  $\text{Mg}_2\text{Sn}$  data<sup>4-5</sup> was fitted to find the Grüneisen parameters (2.5 and 1.7) by considering normal scattering and Umklapp scattering.

Phase segregation was calculated by using the area percentage of  $\text{Mg}_2\text{Sn}$  ( $A_{\text{Mg}_2\text{Sn}}$ ) obtained from ImageJ software.<sup>6</sup> The segregated  $\text{Mg}_2\text{Si}$  ( $A_{\text{Mg}_2\text{Si}}$ ) phase was calculated by multiplying  $A_{\text{Mg}_2\text{Sn}}$  and both atomic ratio (0.6:0.4 for Sn:Si) and areal ratio (square of lattice constant).

$$A_{\text{Mg}_2\text{Si}} = A_{\text{Mg}_2\text{Sn}} \left( \frac{a_{\text{Mg}_2\text{Si}}^2}{a_{\text{Mg}_2\text{Sn}}^2} \times \frac{0.6}{0.4} \right) \quad (\text{S42})$$

where  $a_{\text{Mg}_2\text{Si}}$  and  $a_{\text{Mg}_2\text{Sn}}$  are lattice constants of  $\text{Mg}_2\text{Si}$  and  $\text{Mg}_2\text{Sn}$ , respectively. The total segregated portion was obtained by adding the two segregated areas.

$$A_{\text{Total}} = A_{\text{Mg}_2\text{Si}} + A_{\text{Mg}_2\text{Sn}} \quad (\text{S43})$$

It should be noted that the areal ratio for the two phases is the same as the volumetric ratio, assuming that



the thickness is the same for both.

The relaxation time of holes (minority carriers) was adjusted with a multiplying factor  $\beta$ , ranging from 0 to 1 in order to consider the reduction of bipolar thermal conductivity due to the minority carrier scattering by TiO<sub>2</sub> nanoparticles. For the sample without TiO<sub>2</sub> nanoparticles,  $\beta=1$ .

$$\tau_{HH}(E) = \beta \left( \tau_{AC,HH}^{-1}(E) + \tau_{II,HH}^{-1}(E) + \tau_{POP,HH}^{-1}(E) + \tau_{NI,HH}^{-1}(E) \right)^{-1} \quad (S44)$$

$$\tau_{LH}(E) = \beta \left( \tau_{AC,LH}^{-1}(E) + \tau_{II,LH}^{-1}(E) + \tau_{POP,LH}^{-1}(E) + \tau_{NI,LH}^{-1}(E) \right)^{-1} \quad (S45)$$

### **Error Estimation**

Experimental errors related to thermal conductivity, electrical conductivity, and thermopower measurements were obtained mainly from uncertainty in instrumentation and dimensions. For electrical conductivity, uncertainty related to distance measurement between two probes, width, and thickness was estimated as  $\pm 4\%$ . For thermopower measurements, uncertainty was estimated by using the largest and lowest slope as an upper (+8%) and lower bound (-4%) from the temperature-voltage relation. Thermal conductivity ( $k$ ) was obtained by using the formula  $k = c\rho\alpha$ , where  $c$ ,  $\rho$ , and  $\alpha$  are specific heat, mass density, and thermal diffusivity, respectively. For the density measurement, estimated uncertainty was  $\pm 3\%$  and  $\pm 2\%$  respectively corresponding to volume and mass measurements. For thermal diffusivity,  $\pm 3\%$  was obtained from three consecutive measurements with the flash apparatus. Therefore, the overall uncertainty corresponding to thermal conductivity measurements was estimated to be as  $\pm 8\%$ . Overall uncertainty of the thermoelectric figure-of-merit was then calculated using the error propagation formula shown below.

$$\frac{\Delta ZT}{ZT} = 2 \frac{\Delta S}{S} + \frac{\Delta \sigma}{\sigma} + \frac{\Delta k}{k} \quad (S46)$$

### **References**

1. Bahk, J.-H.; Bian, Z.; Shakouri, A., Electron Transport Modeling and Energy Filtering for Efficient Thermoelectric Mg<sub>2</sub>Si<sub>1-x</sub>Sn<sub>x</sub> Solid Solutions. *Phys. Rev. B: Condens. Matter Mater. Phys.* **2014**, *89*, 075204-1-075204-13.
2. Wang, S.; Mingo, N., Improved Thermoelectric Properties of Mg<sub>2</sub>Si<sub>x</sub>Ge<sub>y</sub>Sn<sub>1-x-y</sub> Nanoparticle-in-Alloy Materials. *Appl. Phys. Lett.* **2009**, *94*, 203109-203109-3.
3. Yi, S.-i.; Yu, C., Modeling of Thermoelectric Properties of SiGe Alloy Nanowires and Estimation of the Best Design Parameters for High Figure-of-Merits. *J. Appl. Phys.* **2015**, *117*, 035105-1-035105-12.
4. Akasaka, M.; Iida, T.; Matsumoto, A.; Yamanaka, K.; Takanashi, Y.; Imai, T.; Hamada, N., The Thermoelectric Properties of Bulk Crystalline n- and p-Type Mg<sub>2</sub>Si Prepared by the Vertical Bridgman Method. *J. Appl. Phys.* **2008**, *104*, 013703-1-013703-8.

5. Martin, J., Thermal Conductivity of  $\text{Mg}_2\text{Si}$ ,  $\text{Mg}_2\text{Ge}$  and  $\text{Mg}_2\text{Sn}$ . *J. Phys. Chem. Solids* **1972**, *33*, 1139-1148.
6. Schneider, C. A.; Rasband, W. S.; Eliceiri, K. W., NIH Image to ImageJ: 25 Years of Image Analysis. *Nat. Methods* **2012**, *9*, 671-675.
